# Supplementary material
Source: Springer Nature journal article supplement (https://www.springermedizin.de/resource/supplementary/12913_2011_2037_MOESM2_ESM.pdf/9529758)

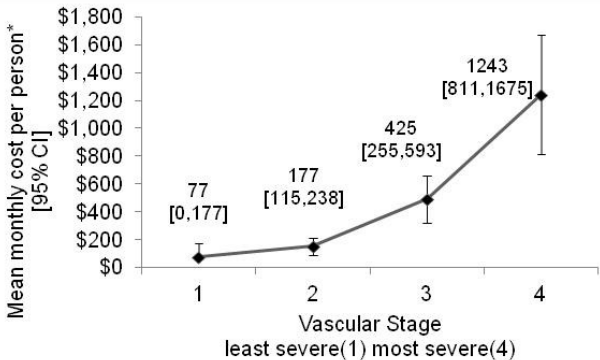

Supplement: MOESM2 [file 9529758]
